# Supplementary material for: Abundance of Transgene Transcript Variants Associated with Somatically Active Transgenic Helitrons from Multiple T-DNA Integration Sites in Maize
Source: MDPI journal article supplement (doi:10.3390/ijms24076574), 2023-03-31
Supplement: s1 [file s1]

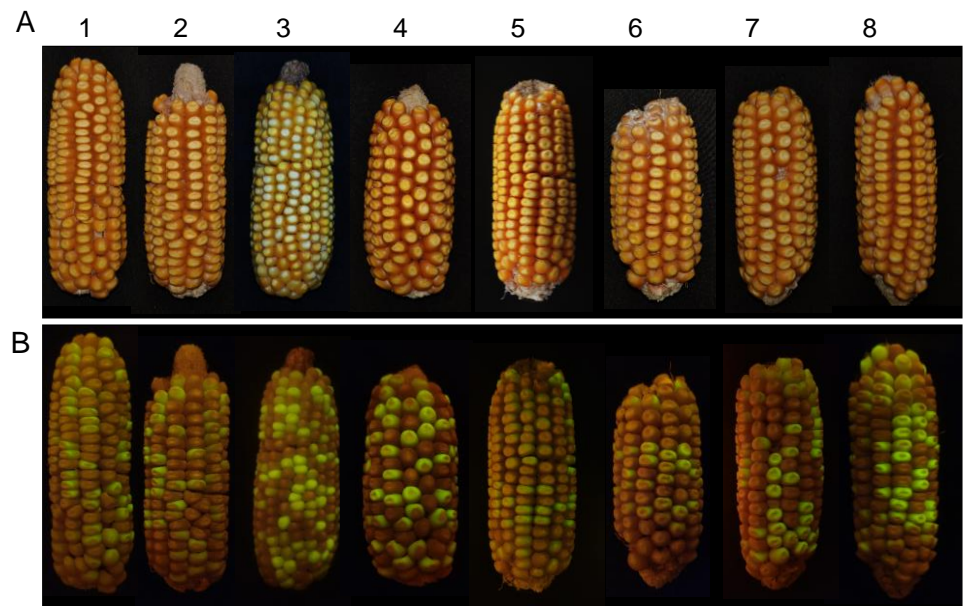

**Figure S1.** Kernel phenotype of  $T_2$  ears. **A**, Representative  $T_2$  ears from crosses of primary transformants with corresponding donor lines for various constructs. Anthocyanin pigmentation is invisible in all  $T_2$  ears for primary transformants harboring individual *cl-dHel-GFP* constructs. **B**, GFP fluorescence, as detected under blue light illumination of the same  $T_2$  ears as in (A), showing the segregation of fluorescent kernels. 1, S3-Hel1613; 2, S3-Hel1158; 3, S3-HelA2; 4, S1-Hel1-4; 5, S2-Hel1-4; 6, S3-Hel1-4; 7, S4-Hel1-4; 8, positive *Cl* transgenic line.

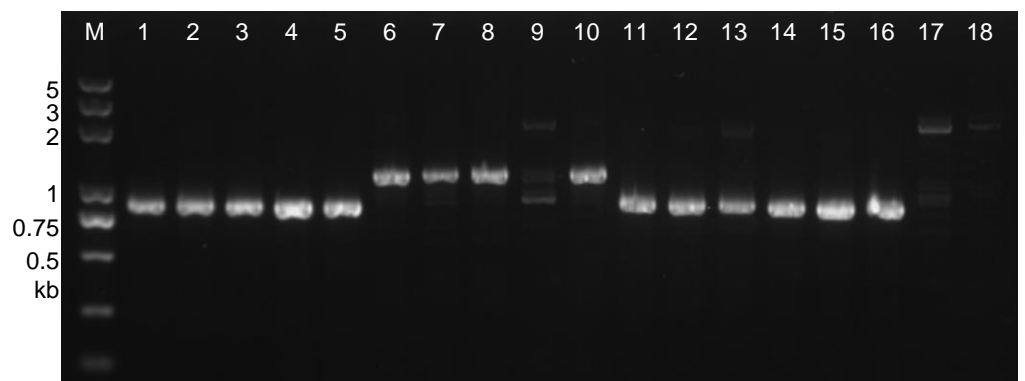

**Figure S2.** An RNA expression analysis of *Cl* in leaf tissue of  $T_2$  transgenic seedlings. RT-PCR primer pairs (C1-5F&C1-3R) are shown in Figure 1A and primer sequences are shown in Table S3. Lane 9 corresponding to one event of S4-Hel1-4 with transcriptional silencing. Transgenic events of Lane 1, 2, 4, 7, 11, 13 and 15 were used for 5' and 3' RACE. Lanes 1, S3-Hel1613; lanes 2-3, S3-Hel1158; lanes 4-5, S3-HelA2; lanes 6-10, S4-Hel1-4; lanes 11-12, S2-Hel1-4; lanes 13-14, S3-Hel1-4; lanes 15, S1-Hel1-4; lanes 16, positive *Cl* transgenic line; lanes 17, B104 donor line; lanes 18, Hi II donor line.

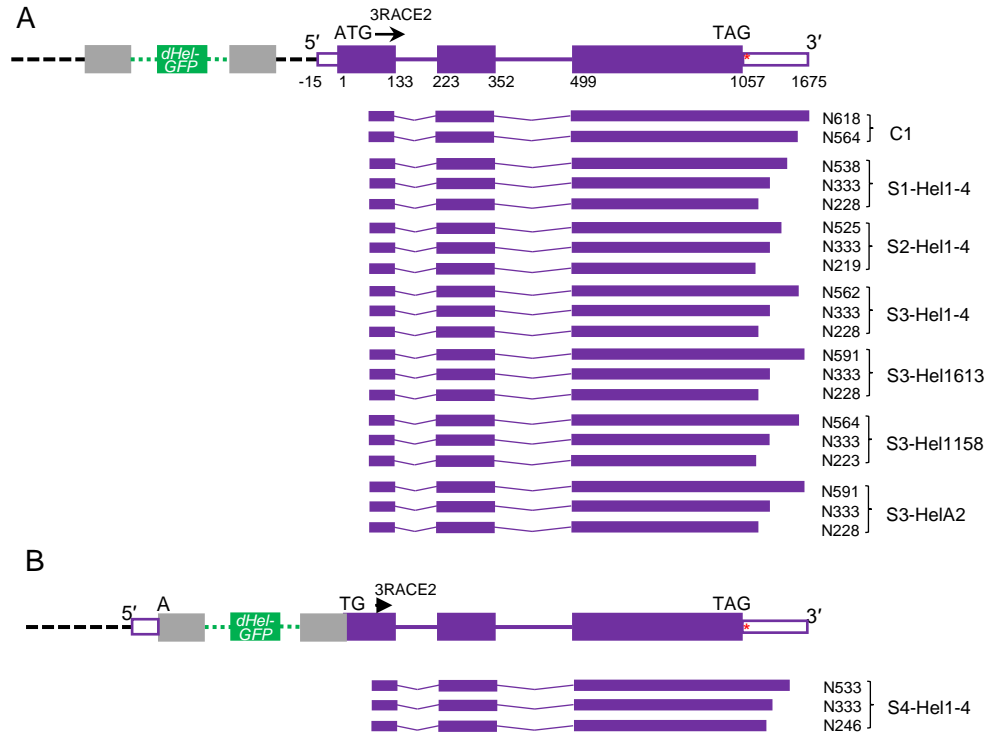

**Figure S3.** Schematic representation of *C1* transcript variants detected by 3' RACE from  $T_2$  transgenic leaf tissue. *GFP* promoter (azs22-10 promoter) and terminator (CAMV 35S terminator) are indicated by orange and red dotted lines respectively. *C1* exons and introns are indicated by purple boxes and lines respectively. *C1* promoter is indicated by black dotted line. 5' and 3' UTR are represented by open boxes. Alternative splicing events at non canonical sites are shown with broken lines. *dHels* are indicated by grey boxes and GFP is indicated by green boxes. Horizontal arrows, primer for 3' RACE. **A**, *C1* transcripts detected in total RNA extracted from leaf tissue of  $T_2$  transgenic plants harboring *dHel* insertions in the *C1* promoter region (sites S1 to S3); **B**, *C1* transcripts detected in total RNA extracted from leaf tissue of  $T_2$  transgenic plants harboring the *dHel* insertion at the translation start site of the *C1* gene (site S4).

**TAG**ACAACA**AGTACACG**TATAGATGTCCAATAAGCACGAGGCCCGCGAGCCCGGCACGAAGCC 60  
 CGCTTTTGGGCCCGGTCCGAGCCCGGCTCGGCCCGGTTATATGCAGACCCGGGCCCGGCC 120  
 CGGCACGAATAAGCGGGCCGGGCTCGGACAGGAAATTAGGCACGGTGAGCTAGCCCGGCA 180  
 CGGCCCGTTTAGGTCTAAGCCCGTTAAGCCCGTTT**TACAC**TAA**ACGT**GCCTTCTCGG 240  
 CCCGC**ATAG**CCCGCTTCTCGGCCCGCTTTTTCGTGCTAAACGGGCCGGCCCGGCCCGTT 300  
 TAGGCCCGTTGCGGGCCGGGCTCGGACAGGAA**TTGAG**CCCGCGTGCTTAGCCGTCCCGG 360  
 CCCGGTTT**TTTAAT**CGTGCCTGGCGGGCCAGGCCCAAACGGGCCGGGCTTACC**GGGCC** 420  
 CGGGCCGGACCGGGCCGGGCGGCCCGTTTGGACATCTCTA**AGTACACG**TATGGAGGAGAA 480  
 TATATATATAGTCATGCGTACGTATAGATTTTTTTCATCCGATCC**CAACAGAAATACG**TAT 540  
 GAAATGCTCTTCGTCTTTT**TCATT**TATCATATCTATACTATACTTAA**ACACCAG**TTT 600  
 CAACGGTCGTCATGCGT**TCATT**TTTTTACAAATAACCCCTCACAGCTATTTCAAATTAATC 660  
 CGCTGCACGTCTATAGATGCCAAACGACGCCCAACACTAGCC 720

**Figure S4.** Schematic representation of 3'-UTR polyadenylation sites in  $T_2$  by 3' RACE. *CI* stop codon is indicated by red bold letters. The polyadenylation sites are highlighted in purple for wild-type *CI* transgenic lines and in green for *cl-dHel*-*GFP* transgenic lines, respectively (Table S4). The downstream sequence of the stop codon is numbered at the right side. The 446-bp *hAT* element is in bold letters, and the TSD sequences are in italic underlined letters.

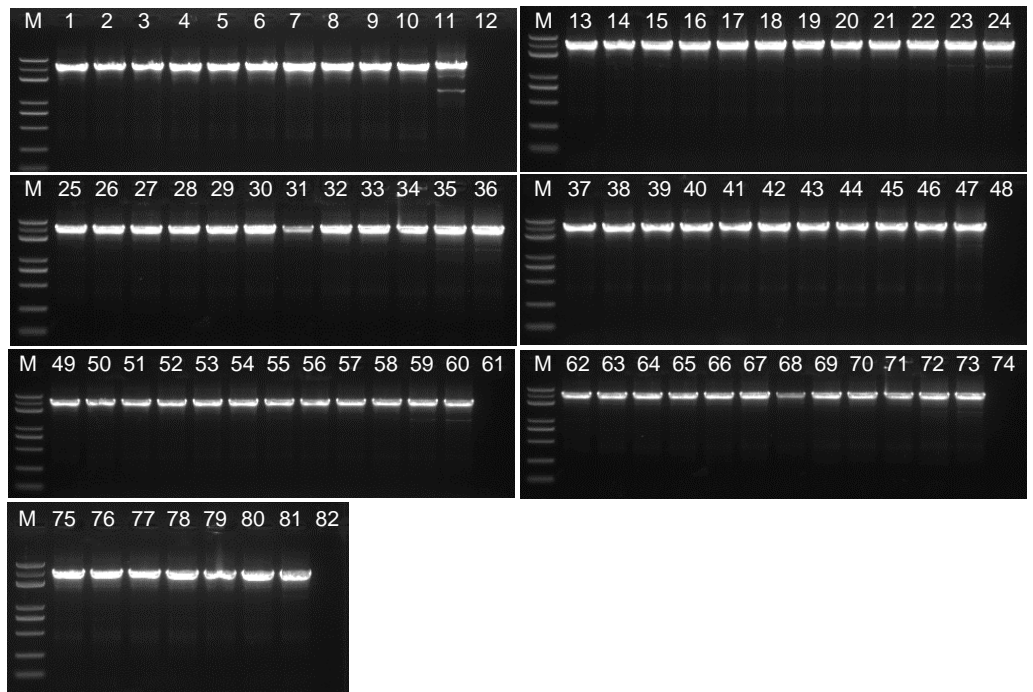

**Figure S5.** PCR amplification of somatic excision products for *dHel* in  $T_2$  transgenic plants. Somatic excision products are detected via nest-PCR from some samples of  $T_2$  transgenic plants. PCR primer pairs are shown in Figure 1A. Lanes 1–10, S3-Hel1613; lanes 13–22, S3-Hel1158; lanes 25–34, S3-HelA2; lanes 37–46, S3-Hel1-4; lanes 49–58, S4-Hel1-4; lanes 62–71, S2-Hel1-4; lanes 75–80, S1-Hel1-4; lanes 12, 48, 61, 74, 82:  $T_2$  non-transgenic plants; lanes 11, 23, 24, 35, 36, 47, 59, 60, 72, 73, 81:  $F_1$  somatic excision plants. DNA Ladder, from top to bottom, 5, 3, 2, 1, 0.75, 0.5, 0.25, 0.1 kb.

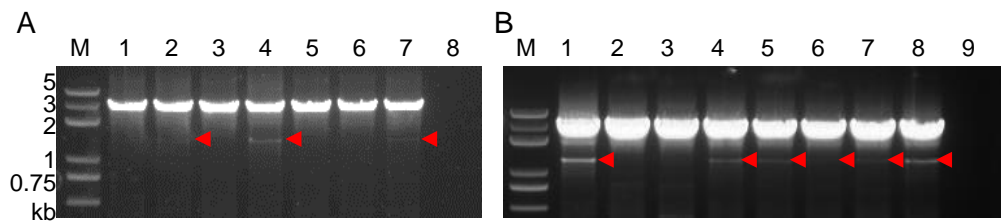

**Figure S6.** PCR amplification of somatic excision products for *dHel* in  $F_1$  segregants from test-crosses between different *c1-dHel-GFP*  $T_2$  transgenic plants and the *c1* tester line. PCR primer pairs are shown in Figure 1A. **A**, Lanes 1–7,  $F_1$ -*S4-Hell-4*; lanes 8,  $F_1$  individuals from a nontransgenic line crossed to the *c1* tester; **B**, lanes 1–8,  $F_1$ -*S1-Hell-4*; lanes 9,  $F_1$  individuals from a nontransgenic line crossed to the *c1* tester. Red arrows, PCR products with the expected size for *dHel* excision products.

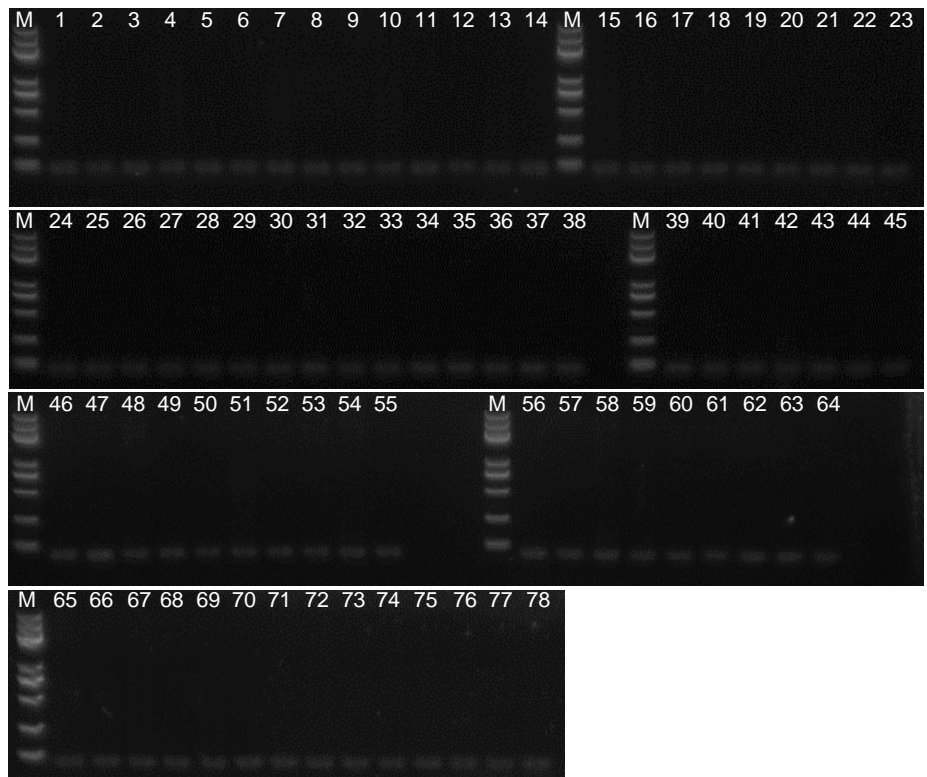

**Figure S7.** PCR detection of circular *dHel* intermediates from leaf tissues in  $F_1$  segregants from test-crosses between different *c1-dHel-GFP*  $T_2$  transgenic plants and the *c1* tester line. Lanes 1–14, S3-Hel1613; lanes 15–22, S1-Hel1-4, same DNA samples in lanes 1–8 from Figure S6B; Lanes 23,  $F_1$  individuals from a cross between a non-transgenic line and the *c1* tester; lanes 24–38, S2-Hel1-4, lanes 39–45, S4-Hel1-4, same DNA samples in lanes 1–7 from Figure S6A; lanes 46–55, S3-Hel1-4; lanes 56–64, S3-HelA2; lanes 65–78, S3-Hel1158. DNA Ladder, from top to bottom, 5, 3, 2, 1, 0.75, 0.5, 0.25, 0.1 kb.

**Table S1.** Sequence features of *dHel* transposons for reporter construction.

| <i>Helitron</i> | Inbred line | Full length<br>(bp) | Modified<br>length (bp) | 5' end<br>(bp) | 3' end<br>(bp) |
|-----------------|-------------|---------------------|-------------------------|----------------|----------------|
| <i>Hel1-4</i>   | H99         | 469                 | 469                     | 233            | 236            |
| <i>Hel1158</i>  | W22         | 1,158               | 739                     | 430            | 309            |
| <i>Hel1613</i>  | B73         | 1,613               | 524                     | 274            | 250            |
| <i>HelA2</i>    | B73         | 6,000               | 781                     | 472            | 309            |

**Table S2.** Inbred lines in test-crossing for autonomous *Helitron* activities

| Inbred line | Wild-type <i>C1</i> | Unilateral cross incompatibility (UCI) | Complete color inhibition ( <i>C1-I</i> ) |
|-------------|---------------------|----------------------------------------|-------------------------------------------|
| 4722        | Yes                 | No                                     | No                                        |
| A554        | Yes                 | No                                     | No                                        |
| A619        | No                  | No                                     | No                                        |
| A632        | No                  | No                                     | No                                        |
| A679        | No                  | No                                     | No                                        |
| B104        | No                  | No                                     | No                                        |
| B37         | No                  | No                                     | No                                        |
| B64         | No                  | No                                     | No                                        |
| B68         | No                  | No                                     | No                                        |
| B73         | No                  | No                                     | No                                        |
| B76         | No                  | No                                     | No                                        |
| C13         | Yes                 | No                                     | No                                        |
| Chang7-2    | Yes                 | No                                     | No                                        |
| CI66        | No                  | No                                     | No                                        |
| CM 105      | No                  | No                                     | No                                        |
| CM7         | No                  | No                                     | No                                        |
| CML 10      | No                  | No                                     | No                                        |
| CML 103     | No                  | No                                     | No                                        |
| CML 108     | No                  | No                                     | No                                        |
| CML 11      | No                  | No                                     | Yes                                       |
| CML 14      | No                  | No                                     | No                                        |
| CML 157Q    | No                  | No                                     | No                                        |
| CML 158Q    | No                  | No                                     | No                                        |
| CML 218     | No                  | No                                     | No                                        |
| CML 220     | No                  | Yes                                    | No                                        |
| CML 247     | No                  | No                                     | No                                        |
| CML 277     | Yes                 | No                                     | No                                        |
| CML 287     | No                  | No                                     | No                                        |
| CML 314     | No                  | No                                     | No                                        |
| CML 321     | No                  | Yes                                    | No                                        |
| CML 322     | No                  | No                                     | No                                        |
| CML 323     | No                  | No                                     | No                                        |
| CML 328     | No                  | No                                     | Yes                                       |
| CML 331     | No                  | No                                     | Yes                                       |
| CML 45      | No                  | No                                     | No                                        |
| CML 52      | No                  | No                                     | No                                        |
| CML 91      | No                  | No                                     | No                                        |
| CML 92      | No                  | No                                     | No                                        |
| CML103      | No                  | No                                     | No                                        |

**Table S2.** *continued*

| Inbred line      | Wild-type <i>C1</i> | Unilateral cross incompatibility (UCI) | Complete color inhibition ( <i>C1-I</i> ) |
|------------------|---------------------|----------------------------------------|-------------------------------------------|
| H105W            | No                  | No                                     | No                                        |
| H84              | No                  | No                                     | No                                        |
| H99              | No                  | No                                     | No                                        |
| HP301            | No                  | Yes                                    | No                                        |
| HP72-11          | Yes                 | Yes                                    | No                                        |
| IA5125           | Yes                 | No                                     | No                                        |
| Ki11             | No                  | No                                     | No                                        |
| Ki14             | No                  | No                                     | No                                        |
| Ky228            | Yes                 | No                                     | No                                        |
| M162W            | No                  | No                                     | No                                        |
| Mo17             | No                  | No                                     | No                                        |
| Mo24W            | No                  | No                                     | No                                        |
| Ms71             | No                  | No                                     | No                                        |
| N192             | No                  | No                                     | No                                        |
| NC268            | No                  | No                                     | No                                        |
| ND246            | No                  | No                                     | No                                        |
| P39              | Yes                 | No                                     | No                                        |
| Pa91             | No                  | No                                     | No                                        |
| Qi319            | No                  | No                                     | No                                        |
| Sg 1533          | No                  | No                                     | No                                        |
| T232             | No                  | No                                     | No                                        |
| Tzi 16           | No                  | No                                     | No                                        |
| Tzi 16           | No                  | No                                     | No                                        |
| Va102            | Yes                 | No                                     | No                                        |
| Va26             | No                  | No                                     | No                                        |
| Va35             | Yes                 | No                                     | No                                        |
| W182BN           | No                  | No                                     | No                                        |
| W64A             | No                  | No                                     | No                                        |
| Wu-312           | No                  | No                                     | No                                        |
| Zheng58          | No                  | No                                     | No                                        |
| <i>c1</i> tester | No                  | No                                     | No                                        |

**Table S3.** Oligonucleotide Primers for PCR Analysis.

| Experiments                 | Name     | Sequence (5' to 3')          |
|-----------------------------|----------|------------------------------|
| RT-PCR                      | C1-5F    | CGAGAGAGCGAGCGCGA            |
|                             | C1-3R    | GTTGTCTACGCAAGCTGCC          |
| 3'-RACE                     | 3RACE1   | GGCGTGTTGCGCGAAGGAAGGCGTTAAG |
|                             | 3RACE2   | ACGATGCCTTGGCCGCCTACGTCAAGG  |
| 5'-RACE                     | 5RACE1   | GAAGAGTCCGCCCCGTGCACCGCACG   |
|                             | 5RACE3   | CGCTATTCTGGCCGGTCTCGCAGGC    |
| Somatic<br>excision         | BF1      | CGTGCTTGTCTCGATGTAGT         |
|                             | BF3      | GTTCTGGGCTCATGGTAGAT         |
|                             | TF35S-1  | TCCCTTACGTCAGTGGAGA          |
|                             | RB3      | CCAGGCTTTACACTTTATGCT        |
|                             | C1-14    | GATGAGCGGCGCTATTCTG          |
|                             | C1R1     | ACACGCATGTACATATGAATGAG      |
| Circular<br><i>dHel-GFP</i> | GFP-R3   | TGAACTTGTGGCCGTTTACG         |
|                             | GFP-R4   | GGTCCTGCTGGAGTTCGT           |
|                             | GFP-R1   | CCCGGTGAACAGCTCCT            |
|                             | GFP-4R   | ATCACTCTCGGCATGGACGA         |
|                             | 22ZEIN-1 | CTACGTGGAATGACATGCA          |
|                             | GFP-R35S | G TTCCTATAGGGTTTCGCTCAT      |



**Table S4.** Polyadenylation sites of *CI* transcripts by 3'-RACE from T<sub>2</sub> transgenic plants.

| Constructs         | Site 1 | Site 2 | Site3 |
|--------------------|--------|--------|-------|
| S1-Hel1-4          | 228    | 333    | 538   |
| S2-Hel1-4          | 219    | 333    | 525   |
| S3-Hel1-4          | 228    | 333    | 562   |
| S4-Hel1-4          | 246    | 333    | 533   |
| S3-Hel1613         | 228    | 333    | 591   |
| S3-Hel1158         | 223    | 333    | 564   |
| S3-HelA2           | 228    | 333    | 591   |
| Positive <i>CI</i> | 564    | 618    | /     |

**Note:** Polyadenylation sites, locations downstream of the *CI* stop codon.

**Table S5.** Sequence features of *CI* transcript detected by 5' RACE.

| Construct          | Transcript<br>in Figure 5 | Sequence<br>length (bp) | Initiation site                                    |
|--------------------|---------------------------|-------------------------|----------------------------------------------------|
| Positive <i>CI</i> | CK                        | 472                     | Canonical -15 bp                                   |
| S1-Hel1-4          | A1                        | 566                     | 16 bp upstream from <i>dHel</i> 3'-end             |
|                    | A2                        | 472                     | Canonical -15 bp                                   |
|                    | A3                        | 561                     | Canonical -15 bp                                   |
| S2-Hel1-4          | A4                        | 475                     | Canonical -15 bp                                   |
|                    | A5                        | 340                     | 16 bp upstream from the 2 <sup>nd</sup> exon       |
| S3-Hel1-4          | A6                        | 660                     | 67 bp upstream from <i>dHel</i> 3'-end             |
|                    | A7                        | 472                     | Canonical -15 bp                                   |
|                    | A8                        | 618                     | Canonical -15 bp                                   |
| S3-Hel1613         | A9                        | 340                     | 16 bp upstream from the 2 <sup>nd</sup> exon       |
|                    | A10                       | 472                     | Canonical -15 bp                                   |
|                    | A11                       | 340                     | 16 bp upstream from the 2 <sup>nd</sup> exon       |
| S3-Hel1158         | A12                       | 472                     | Canonical -15 bp                                   |
|                    | A13                       | 340                     | 16 bp upstream from the 2 <sup>nd</sup> exon       |
|                    | A14                       | 2560                    | 20 bp upstream from <i>dHel</i> 5'-end             |
| S3-HelA2           | A15                       | 971                     | 20 bp upstream from <i>dHel</i> 5'-end             |
|                    | A16                       | 1018                    | 19 bp upstream from <i>dHel</i> 5'-end             |
|                    | A17                       | 908                     | 44 bp downstream of <i>dHel</i> 5'-end             |
|                    | A18                       | 970                     | 30 bp downstream of <i>dHel</i> 5'-end             |
|                    | A19                       | 517                     | 13 bp upstream from <i>dHel</i> 3'-end             |
|                    | A20                       | 458                     | 1 bp upstream from 1 <sup>st</sup> exon            |
|                    | A21                       | 455                     | nucleotide position 3 in the 1 <sup>st</sup> exon  |
|                    | B1                        | 2250                    | 68 bp upstream from <i>dHel</i> 5'-TC              |
|                    | B2                        | 1917                    | 67 bp upstream from <i>dHel</i> 5'-TC              |
| S4-Hel1-4          | B3                        | 793                     | 18 bp upstream from <i>dHel</i> 5'-TC              |
|                    | B4                        | 559                     | 12 bp upstream from <i>dHel</i> 5'-TC              |
|                    | B5                        | 523                     | 67 bp upstream from <i>dHel</i> 3'-end             |
|                    | B6                        | 626                     | nucleotide position 67 in the 1 <sup>st</sup> exon |
|                    | B7                        | 544                     | nucleotide position 3 in the 1 <sup>st</sup> exon  |
|                    | B8                        | 534                     | nucleotide position 70 in the 1 <sup>st</sup> exon |
|                    | B9                        | 388                     | nucleotide position 70 in the 1 <sup>st</sup> exon |
|                    | B10                       | 486                     | 16 bp upstream from the 2 <sup>nd</sup> exon       |
|                    | B11                       | 340                     | 16 bp upstream from the 2 <sup>nd</sup> exon       |

**Note:** Putative wild type *CI* transcripts are in red.

**Table S6.** Sequence patterns surrounding the transcription start site (TSS) of *C1* transcript detected by 5' RACE.

| Dinucleotides flanking TSS ( $\pm 1$ bp) | Transcript variants in Figure 5 | TATA-box location to TSS | TATA-box motif | CG content between TATA-box and TSS (%) |
|------------------------------------------|---------------------------------|--------------------------|----------------|-----------------------------------------|
| CA                                       | A1                              | -34 to -31               | TATA           | 47                                      |
|                                          | A5                              | -36 to -28               | ATATATATA      | 70                                      |
|                                          | A6                              | -35 to -29               | TACAAAA        | 57                                      |
|                                          | A9                              | -36 to -28               | ATATATATA      | 70                                      |
|                                          | A11                             | -36 to -28               | ATATATATA      | 70                                      |
|                                          | A13                             | -36 to -28               | ATATATATA      | 70                                      |
|                                          | A14                             | ND                       | ND             | ND                                      |
|                                          | A15                             | ND                       | ND             | ND                                      |
|                                          | A16                             | ND                       | ND             | ND                                      |
|                                          | B1                              | ND                       | ND             | ND                                      |
|                                          | B5                              | -35 to -29               | TACAAAA        | 57                                      |
|                                          | B10                             | -36 to -28               | ATATATATA      | 70                                      |
|                                          | B11                             | -36 to -28               | ATATATATA      | 70                                      |
| CG                                       | CK (pTSS)                       | -33 to -26               | ATTTAAATA      | 62                                      |
|                                          | A2                              | -33 to -26               | ATTTAAATA      | 62                                      |
|                                          | A3                              | -33 to -26               | ATTTAAATA      | 62                                      |
|                                          | A4                              | -33 to -26               | ATTTAAATA      | 62                                      |
|                                          | A7                              | -33 to -26               | ATTTAAATA      | 62                                      |
|                                          | A8                              | -33 to -26               | ATTTAAATA      | 62                                      |
|                                          | A10                             | -33 to -26               | ATTTAAATA      | 62                                      |
|                                          | A12                             | -33 to -26               | ATTTAAATA      | 62                                      |
|                                          | A20                             | -46 to -39               | TTTAAATA       | 68                                      |
|                                          | B6                              | ND                       | ND             | ND                                      |
| TG                                       | A17                             | -31 to -28               | TATA           | 52                                      |
|                                          | A21                             | -49 to -42               | TTTAAATA       | 66                                      |
|                                          | B7                              | -51 to -48               | TATA           | 49                                      |
|                                          | B8                              | ND                       | ND             | ND                                      |
|                                          | B9                              | ND                       | ND             | ND                                      |
| AC                                       | B2                              | ND                       | ND             | ND                                      |
| AG                                       | A18                             | -17 to -14               | TATA           | 50                                      |
|                                          | B4                              | -36 to -29               | TTTAAATA       | 64                                      |
| GA                                       | B3                              | -30 to -23               | TTTAAATA       | 68                                      |
| GG                                       | A19                             | -44 to -37               | TTTATATA       | 36                                      |

Note: pTSS, primary transcription start site; ND, not detected

**Table S7.** Circular *dHel* intermediates detection in different populations.

| Construct  | Expected size<br>(bp) | PCR products in T <sub>2</sub><br>(bp) | PCR products in<br>F <sub>1</sub> (bp) |
|------------|-----------------------|----------------------------------------|----------------------------------------|
| S1-Hel1-4  | 651                   | 345                                    | 500                                    |
| S2-Hel1-4  | 651                   | ND                                     | ND                                     |
| S3-Hel1-4  | 651                   | ND                                     | ND                                     |
| S4-Hel1-4  | 651                   | ND                                     | ND                                     |
| S3-Hel1613 | 706                   | ND                                     | ND                                     |
| S3-Hel1158 | 920                   | ND                                     | 593                                    |
| S3-HelA2   | 963                   | ND                                     | ND                                     |

**Note:** The expected circular *dHel* intermediates include both intact 5'-TC and 3'-CTAG sequences. F<sub>1</sub> segregants from a test-cross between different *c1-dHel-GFP* transgenic plants and the *c1* tester line. Sequence analysis showed that PCR amplifications from T<sub>2</sub>-S1-Hel1-4 (Figure 7 B5), F<sub>1</sub>-S1-Hel1-4 (Figure 7 C38), F<sub>1</sub>-S1-Hel1158 (Figure 7 C9) are 345 bp, 500 bp and 593 bp in length, respectively (Figure 7D). ND, not detected.

**Table S8.** Palindromic sequences in *dHel-GFP* constructs.

| <i>dHel</i> | Palindromic sequences   | Location to 3'-<br>end CTAG (bp) |
|-------------|-------------------------|----------------------------------|
| Hel1-4      | AAATCGAGATTT            | 33                               |
|             | TTTTTACCAAAAA           | 210                              |
| Hel1613     | CCCGTTGCAACGCACGGG      | 11                               |
| Hel1158     | TAAAAAATCTTGAAATTTTTTTA | 58                               |
| HelA2       | TTTATATATTCATACAAA      | 39                               |
|             | TTTACAAAATTCTAAA        | 141                              |
